# Supplementary material for: Vanadium, niobium and tantalum complexes with terminal sulfur radical ligands
Source: Royal Society of Chemistry journal article supplement (doi:10.1039/d1dt01956b), 2021-01-01
Supplement: d1dt01956b1.pdf [file d1dt01956b1.pdf]

Vanadium, niobium and tantalum complexes with terminal sulfur radical ligands

Rui Wei<sup>1,2</sup>, Jingwen Hu<sup>1,2</sup>, Xiuting Chen<sup>1</sup>, and Yu Gong<sup>1\*</sup>

1 Department of Radiochemistry, Shanghai Institute of Applied Physics, Chinese Academy  
of Sciences, Shanghai 201800, China

2 School of Nuclear Science and Technology, University of Chinese Academy of Sciences,  
Beijing 100049, China

\*Email: [gongyu@sinap.ac.cn](mailto:gongyu@sinap.ac.cn)

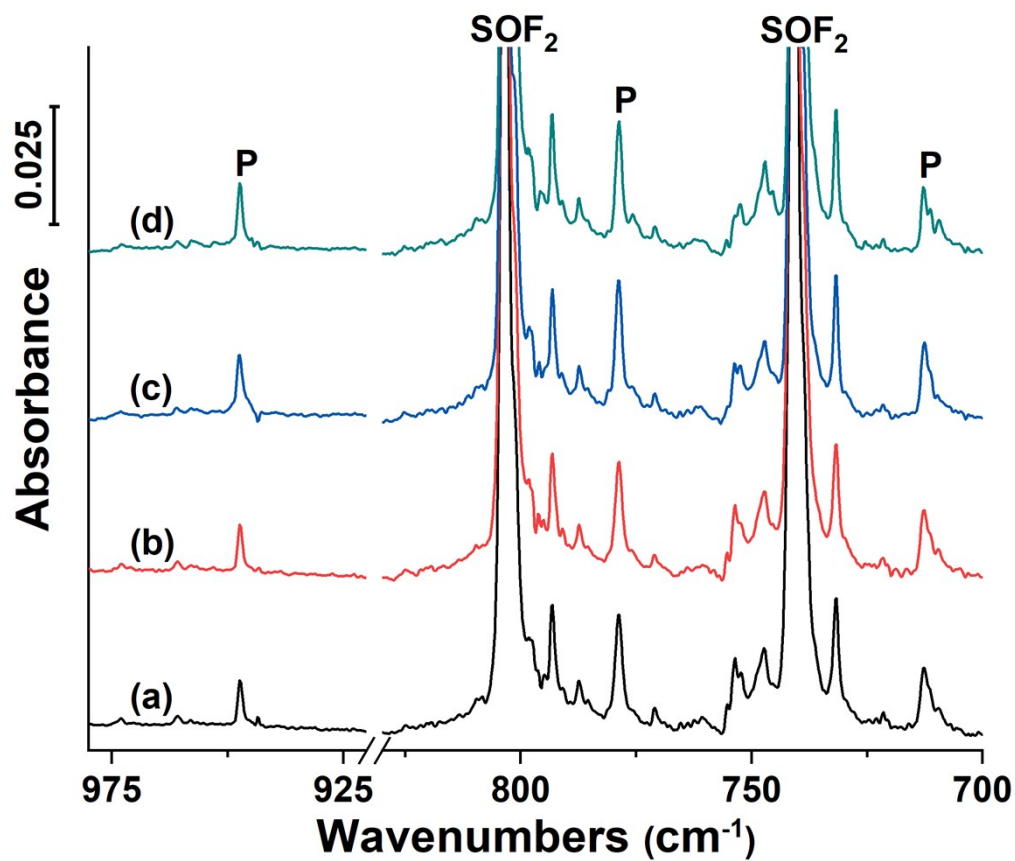

**Fig. S1.** Infrared spectra in the product regions from the reactions of laser-ablated vanadium atoms and 0.5%  $\text{SOF}_2$  in neon matrixes at 4 K. (a) after codeposition for 30 min; (b) after annealing to 6 K; (c) after  $\lambda > 220$  nm UV-vis irradiation for 15 min; (d) after annealing to 8 K. P denotes the  $\text{V(O)(S)F}_2$  bands at 1004.2, 778.7 and 712.8  $\text{cm}^{-1}$ .

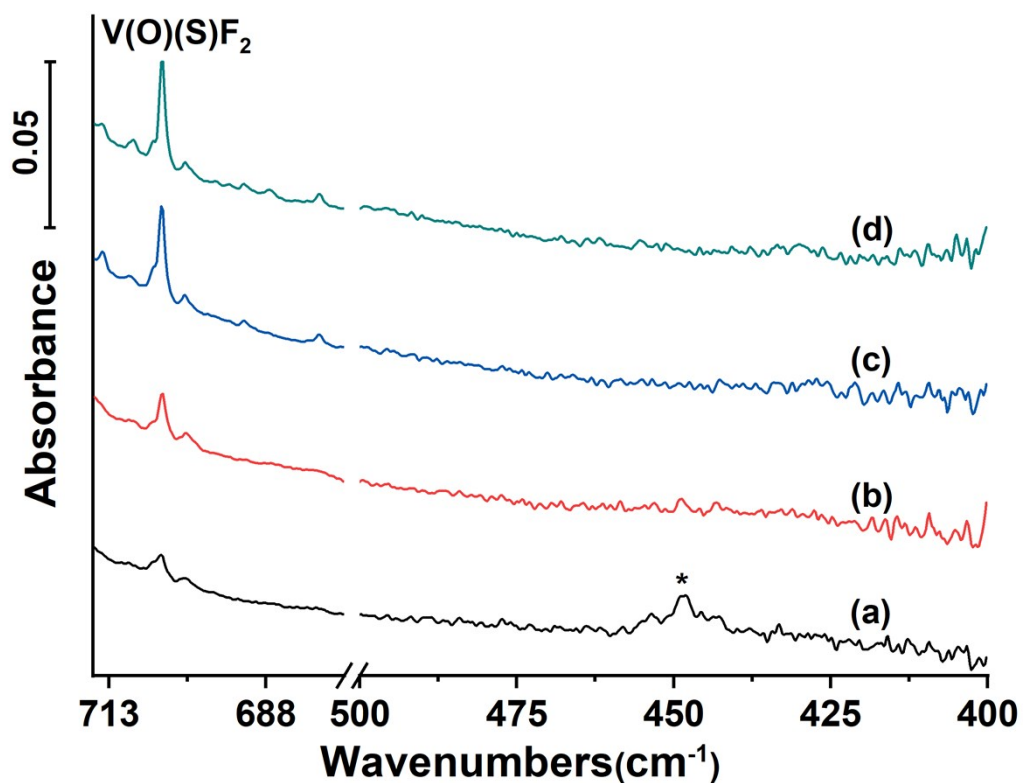

**Fig. S2.** Infrared spectra showing the region down to 400  $\text{cm}^{-1}$  from the reactions of laser-ablated vanadium atoms and 0.5%  $\text{SO}_2$  in argon matrixes at 4 K. (a) after codeposition for 60 min; (b) after annealing to 25 K; (c) after  $\lambda > 220$  nm UV-vis irradiation for 20 min; (d) after annealing to 30 K. The asterisk denotes a metal independent band.

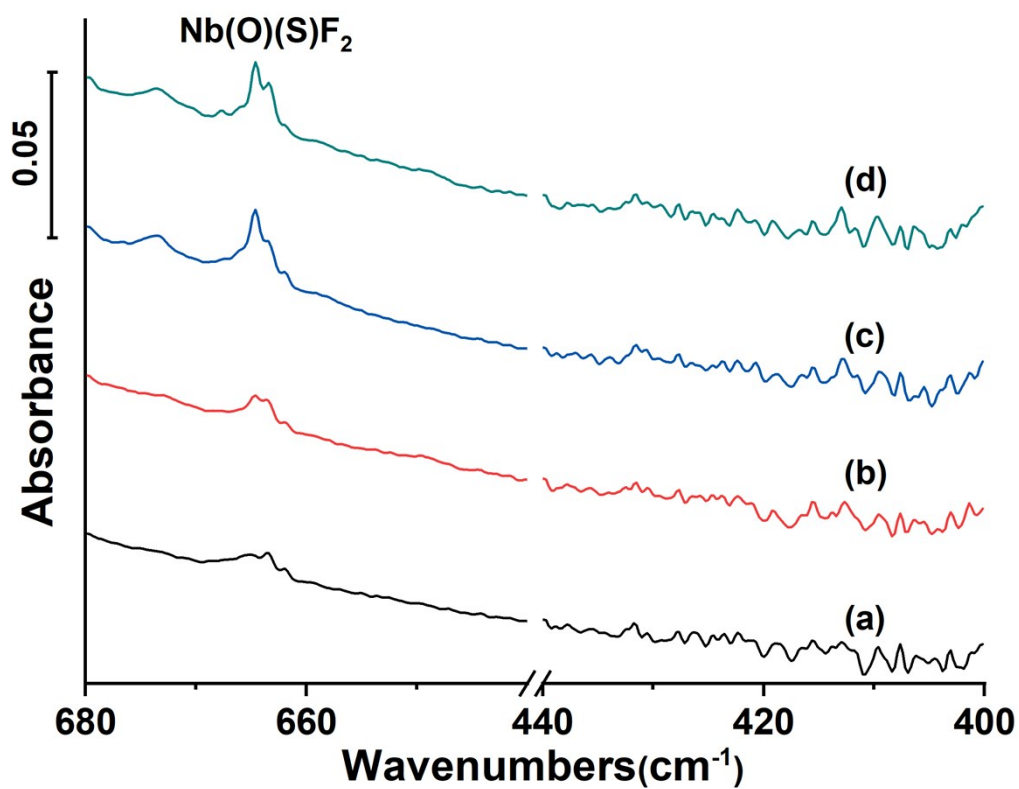

**Fig. S3.** Infrared spectra showing the region down to 400 cm<sup>-1</sup> from the reactions of laser-ablated niobium atoms and 0.5% SOF<sub>2</sub> in argon matrixes at 4 K. (a) after codeposition for 60 min; (b) after annealing to 25 K; (c) after  $\lambda > 220$  nm UV-vis irradiation for 20 min; (d) after annealing to 30 K.

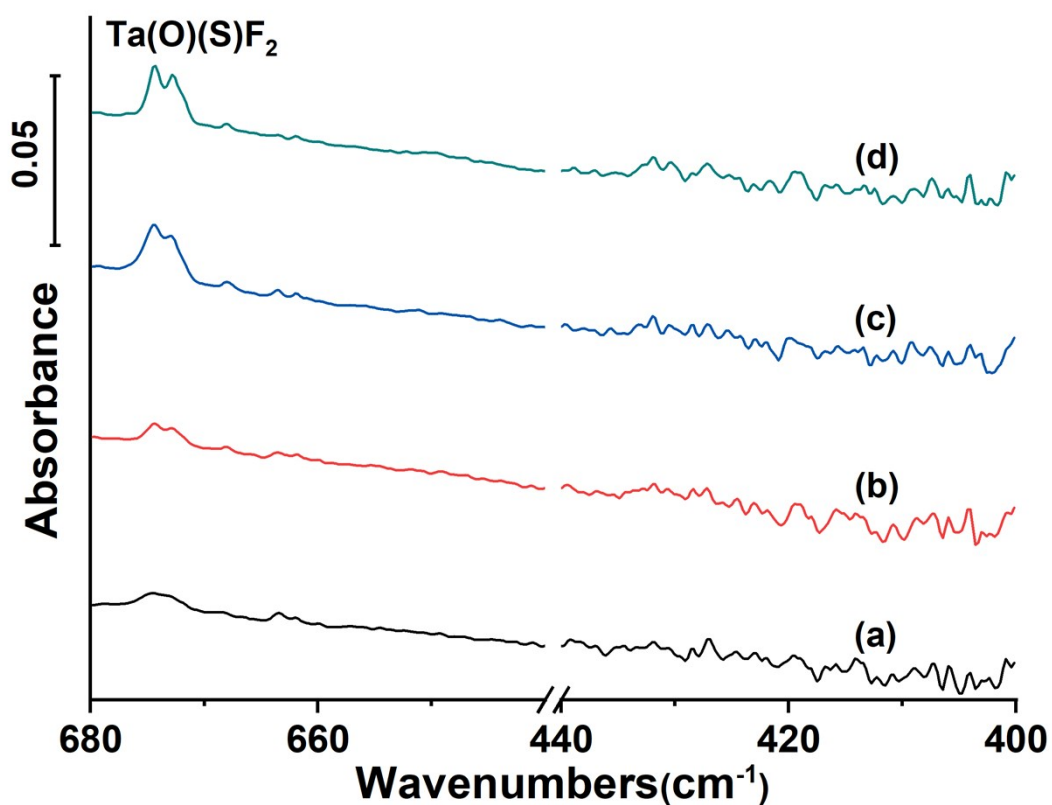

**Fig. S4.** Infrared spectra showing the region down to  $400\text{ cm}^{-1}$  from the reactions of laser-ablated tantalum atoms and 0.5%  $\text{SO}_2$  in argon matrixes at 4 K. (a) after codeposition for 60 min; (b) after annealing to 25 K; (c) after  $\lambda > 220\text{ nm}$  UV-vis irradiation for 20 min; (d) after annealing to 30 K.

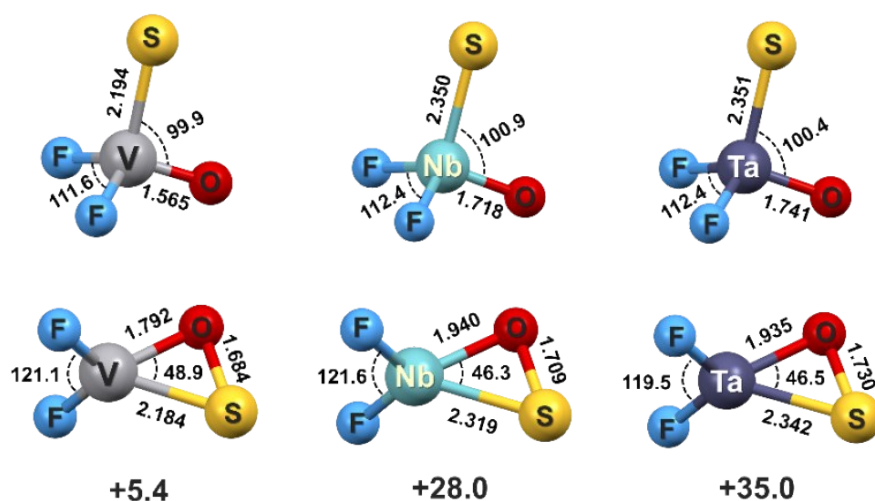

**Fig. S5.** Optimized structures of  $M(O)(S)F_2$  and  $MF_2(\eta^2-SO)$  ( $M = V, Nb$  and  $Ta$ ) (bond lengths in angstroms and bond angles in degrees) with  $C_s$  symmetry and  $^2A'$  ground state at the B3LYP/6-311+G(3df)/SDD level of theory. The energies (kcal/mol) are relative to the most stable  $M(O)(S)F_2$  isomers.

**Table S1.** Experimental vibrational frequencies ( $\text{cm}^{-1}$ ) of the  $\text{M}(\text{O})(\text{S})\text{F}_2$  ( $\text{M} = \text{V}, \text{Nb}$  and  $\text{Ta}$ ) complexes in argon matrixes.

|                                           | mode                 | $\text{SO}\text{F}_2$ | $\text{S}^{18}\text{OF}_2$ | $^{34}\text{SO}\text{F}_2$ |
|-------------------------------------------|----------------------|-----------------------|----------------------------|----------------------------|
| $\text{V}(\text{O})(\text{S})\text{F}_2$  | V-O str.             | 999.4                 | 959.3                      |                            |
|                                           | antisym. F-V-F str.  | 770.1                 | 770.0                      |                            |
|                                           | sym. F-V-F str.      | 704.0                 | 702.5                      |                            |
| $\text{Nb}(\text{O})(\text{S})\text{F}_2$ | Nb-O str.            | 961.4                 | 914.5                      | 961.4                      |
|                                           | antisym. F-Nb-F str. | 689.1                 | 689.0                      | 689.1                      |
|                                           | sym. F-Nb-F str.     | 664.6                 | 664.5                      | 664.6                      |
| $\text{Ta}(\text{O})(\text{S})\text{F}_2$ | Ta-O str.            | 955.2                 | 905.7                      |                            |
|                                           | antisym. F-Ta-F str. | 674.4                 | 674.3                      |                            |
|                                           | sym. F-Ta-F str.     | 672.8                 | 672.8                      |                            |

**Table S2.** Calculated vibrational frequencies ( $\text{cm}^{-1}$ ) and intensities (km/mol, in parenthesis) of  $\text{M}(\text{O})(\text{S})\text{F}_2$  ( $\text{M} = \text{V}, \text{Nb}$  and  $\text{Ta}$ ) with different functionals and the 6-311+G(3df)/SDD basis sets.

| mode                                      | B3LYP       | M06         | BP86        |
|-------------------------------------------|-------------|-------------|-------------|
| $\text{V}(\text{O})(\text{S})\text{F}_2$  |             |             |             |
| V–O str.                                  | 1079.4(133) | 1102.9(153) | 1015.8(101) |
| antisym. F–V–F str.                       | 782.8(174)  | 794.3(185)  | 762.2(148)  |
| sym. F–V–F str.                           | 723.6(167)  | 735.0(178)  | 702.4(135)  |
| V–S str.                                  | 455.6(32)   | 474.0(32)   | 444.1(19)   |
| $\text{Nb}(\text{O})(\text{S})\text{F}_2$ |             |             |             |
| Nb–O str.                                 | 979.6(114)  | 1000.8(134) | 923.3(81)   |
| antisym. F–Nb–F str.                      | 696.9(164)  | 705.6(178)  | 683.2(145)  |
| sym. F–Nb–F str.                          | 669.8(140)  | 675.1(147)  | 654.7(123)  |
| Nb–S str.                                 | 405.2(35)   | 413.7(40)   | 400.0(21)   |
| $\text{Ta}(\text{O})(\text{S})\text{F}_2$ |             |             |             |
| Ta–O str.                                 | 946.8(81)   | 965.8(97)   | 891.3(56)   |
| antisym. F–Ta–F str.                      | 671.3(129)  | 678.4(141)  | 658.5(116)  |
| sym. F–Ta–F str.                          | 664.9(112)  | 670.6(116)  | 650.6(101)  |
| Ta–S str.                                 | 381.9(22)   | 390.4(26)   | 381.0(12)   |



**Table S3.** Orbital composition of the M–S bond in M(O)(S)F<sub>2</sub> (M = V, Nb and Ta) from NBO calculations at the B3LYP/6-311+G(d)/SDD level.

|                        | bond type          |   | % of NBO on each atom | % of each hybrid in the NBO from each atom |       |       |
|------------------------|--------------------|---|-----------------------|--------------------------------------------|-------|-------|
|                        |                    |   |                       | s                                          | p     | d     |
| V(O)(S)F <sub>2</sub>  | σ(V-S)             | α | V (27.83)             | 33.45                                      | 1.33  | 65.14 |
|                        |                    |   | S (72.17)             | 9.99                                       | 89.76 | 0.25  |
|                        |                    | β | V (31.50)             | 33.64                                      | 1.39  | 64.88 |
|                        |                    |   | S (68.50)             | 9.92                                       | 89.77 | 0.31  |
|                        | n <sub>1</sub> (S) | α | S                     | 0.03                                       | 99.92 | 0.05  |
|                        | n <sub>2</sub> (S) | α | S                     | 0.00                                       | 99.90 | 0.10  |
| β                      |                    | S | 0.00                  | 99.87                                      | 0.13  |       |
| Nb(O)(S)F <sub>2</sub> | σ(Nb-S)            | α | Nb (25.02)            | 33.45                                      | 1.10  | 65.45 |
|                        |                    |   | S (74.98)             | 11.55                                      | 88.17 | 0.28  |
|                        |                    | β | Nb (27.37)            | 33.88                                      | 1.15  | 64.97 |
|                        |                    |   | S (72.63)             | 12.04                                      | 87.62 | 0.34  |
|                        | n <sub>1</sub> (S) | α | S                     | 0.02                                       | 99.91 | 0.07  |
|                        | n <sub>2</sub> (S) | α | S                     | 0.00                                       | 99.89 | 0.11  |
| β                      |                    | S | 0.00                  | 99.88                                      | 0.12  |       |
| Ta(O)(S)F <sub>2</sub> | σ(Ta-S)            | α | Ta (23.82)            | 33.91                                      | 1.17  | 64.92 |
|                        |                    |   | S (76.18)             | 12.39                                      | 87.34 | 0.27  |
|                        |                    | β | Ta (25.88)            | 34.49                                      | 1.19  | 64.32 |
|                        |                    |   | S (74.12)             | 13.18                                      | 86.49 | 0.33  |
|                        | n <sub>1</sub> (S) | α | S                     | 0.01                                       | 99.90 | 0.09  |
|                        | n <sub>2</sub> (S) | α | S                     | 0.00                                       | 99.87 | 0.13  |
| β                      |                    | S | 0.00                  | 99.86                                      | 0.14  |       |

**Table S4.** Calculated vibrational frequencies ( $\text{cm}^{-1}$ ) and intensities ( $\text{km/mol}$ ) of  $\text{MF}_2(\eta^2\text{-SO})$

(M = V, Nb and Ta).

|                                  | frequency (intensity) <sup>a</sup>                            |
|----------------------------------|---------------------------------------------------------------|
| $\text{VF}_2(\eta^2\text{-SO})$  | 822.6 (131), 773.7 (227), 717.7 (143), 542.0 (15), 423.8 (13) |
| $\text{NbF}_2(\eta^2\text{-SO})$ | 770.7 (88), 698.6 (189), 666.0 (138), 547.4 (5), 398.1 (16)   |
| $\text{TaF}_2(\eta^2\text{-SO})$ | 752.0 (64), 678.2 (140), 667.7 (110), 525.3 (11), 369.9 (16)  |

<sup>a</sup> only frequencies above  $350 \text{ cm}^{-1}$  are listed.

**Cartesian coordinates of all the optimized geometries (doublet states) obtained at the B3LYP/6-311+G(3df)/SDD level of theory.**

**VF<sub>2</sub>( $\eta^2$ -SO)**

| <b>Atom</b> | <b>X</b>  | <b>Y</b>  | <b>Z</b>  |
|-------------|-----------|-----------|-----------|
| V           | -0.032542 | 0.467204  | 0.000000  |
| F           | -0.257744 | 1.293902  | 1.518074  |
| F           | -0.257744 | 1.293902  | -1.518074 |
| S           | -0.257744 | -1.705190 | 0.000000  |
| O           | 1.188972  | -0.844112 | 0.000000  |

**TS (V)**

| <b>Atom</b> | <b>X</b>  | <b>Y</b>  | <b>Z</b>  |
|-------------|-----------|-----------|-----------|
| V           | 0.011279  | 0.426031  | 0.000000  |
| F           | -0.323860 | 1.259764  | 1.490646  |
| F           | -0.323860 | 1.259764  | -1.490646 |
| S           | -0.323860 | -1.772999 | 0.000000  |
| O           | 1.343981  | -0.513312 | 0.000000  |

**V(O)(S)F<sub>2</sub>**

| <b>Atom</b> | <b>X</b>  | <b>Y</b>  | <b>Z</b>  |
|-------------|-----------|-----------|-----------|
| V           | -0.334259 | -0.031877 | 0.000000  |
| F           | -0.833212 | -0.871740 | 1.438723  |
| F           | -0.833212 | -0.871740 | -1.438723 |
| S           | 1.834467  | 0.300770  | 0.000000  |
| O           | -0.833212 | 1.451522  | 0.000000  |

**NbF<sub>2</sub>(η<sup>2</sup>-SO)**

| <b>Atom</b> | <b>X</b>  | <b>Y</b>  | <b>Z</b>  |
|-------------|-----------|-----------|-----------|
| F           | -0.247930 | 1.289059  | 1.648795  |
| F           | -0.247930 | 1.289059  | -1.648795 |
| S           | -0.247930 | -1.917428 | 0.000000  |
| O           | 1.236961  | -1.072387 | 0.000000  |
| Nb          | -0.035757 | 0.391583  | 0.000000  |

**TS (Nb)**

| <b>Atom</b> | <b>X</b>  | <b>Y</b>  | <b>Z</b>  |
|-------------|-----------|-----------|-----------|
| Nb          | -0.449075 | -0.269164 | -0.001287 |
| F           | -1.035278 | -1.022367 | 1.631428  |
| F           | -1.012318 | -1.026896 | -1.640125 |
| S           | 1.682954  | 0.781899  | 0.011893  |
| O           | -0.185724 | 1.513462  | -0.001910 |

**Nb(O)(S)F<sub>2</sub>**

| <b>Atom</b> | <b>X</b>  | <b>Y</b>  | <b>Z</b>  |
|-------------|-----------|-----------|-----------|
| F           | -0.839484 | -0.916703 | 1.572557  |
| F           | -0.839484 | -0.916703 | -1.572557 |
| S           | 2.054824  | 0.315922  | 0.000000  |
| O           | -0.839484 | 1.589739  | 0.000000  |
| Nb          | -0.269527 | -0.031025 | 0.000000  |

**TaF<sub>2</sub>(η<sup>2</sup>-SO)**

| <b>Atom</b> | <b>X</b>  | <b>Y</b>  | <b>Z</b>  |
|-------------|-----------|-----------|-----------|
| F           | -0.243889 | 1.207357  | 1.631700  |
| F           | -0.243889 | 1.207357  | -1.631700 |
| S           | -0.243889 | -2.050733 | 0.000000  |
| O           | 1.249569  | -1.177235 | 0.000000  |

|    |           |          |          |
|----|-----------|----------|----------|
| Ta | -0.023347 | 0.280783 | 0.000000 |
|----|-----------|----------|----------|

### **TS (Ta)**

| <b>Atom</b> | <b>X</b>  | <b>Y</b>  | <b>Z</b>  |
|-------------|-----------|-----------|-----------|
| Ta          | -0.457410 | -0.271580 | 0.000000  |
| F           | -1.000352 | -1.064140 | 1.630343  |
| F           | -1.000352 | -1.064140 | -1.630343 |
| S           | 1.655370  | 0.841689  | 0.000000  |
| O           | -0.196684 | 1.535107  | 0.000000  |

### **Ta(O)(S)F<sub>2</sub>**

| <b>Atom</b> | <b>X</b>  | <b>Y</b>  | <b>Z</b>  |
|-------------|-----------|-----------|-----------|
| F           | -0.765002 | -0.913453 | 1.575766  |
| F           | -0.765002 | -0.913453 | -1.575766 |
| S           | 2.129493  | 0.333170  | 0.000000  |
| O           | -0.765002 | 1.619956  | 0.000000  |
| Ta          | -0.194272 | -0.0253   |           |
